# Supplementary material
Source: Springer Nature journal article supplement (https://www.springermedizin.de/resource/supplementary/12913_2006_287_MOESM1_ESM.pdf/9534412)

### NORWAY

### FINLAND

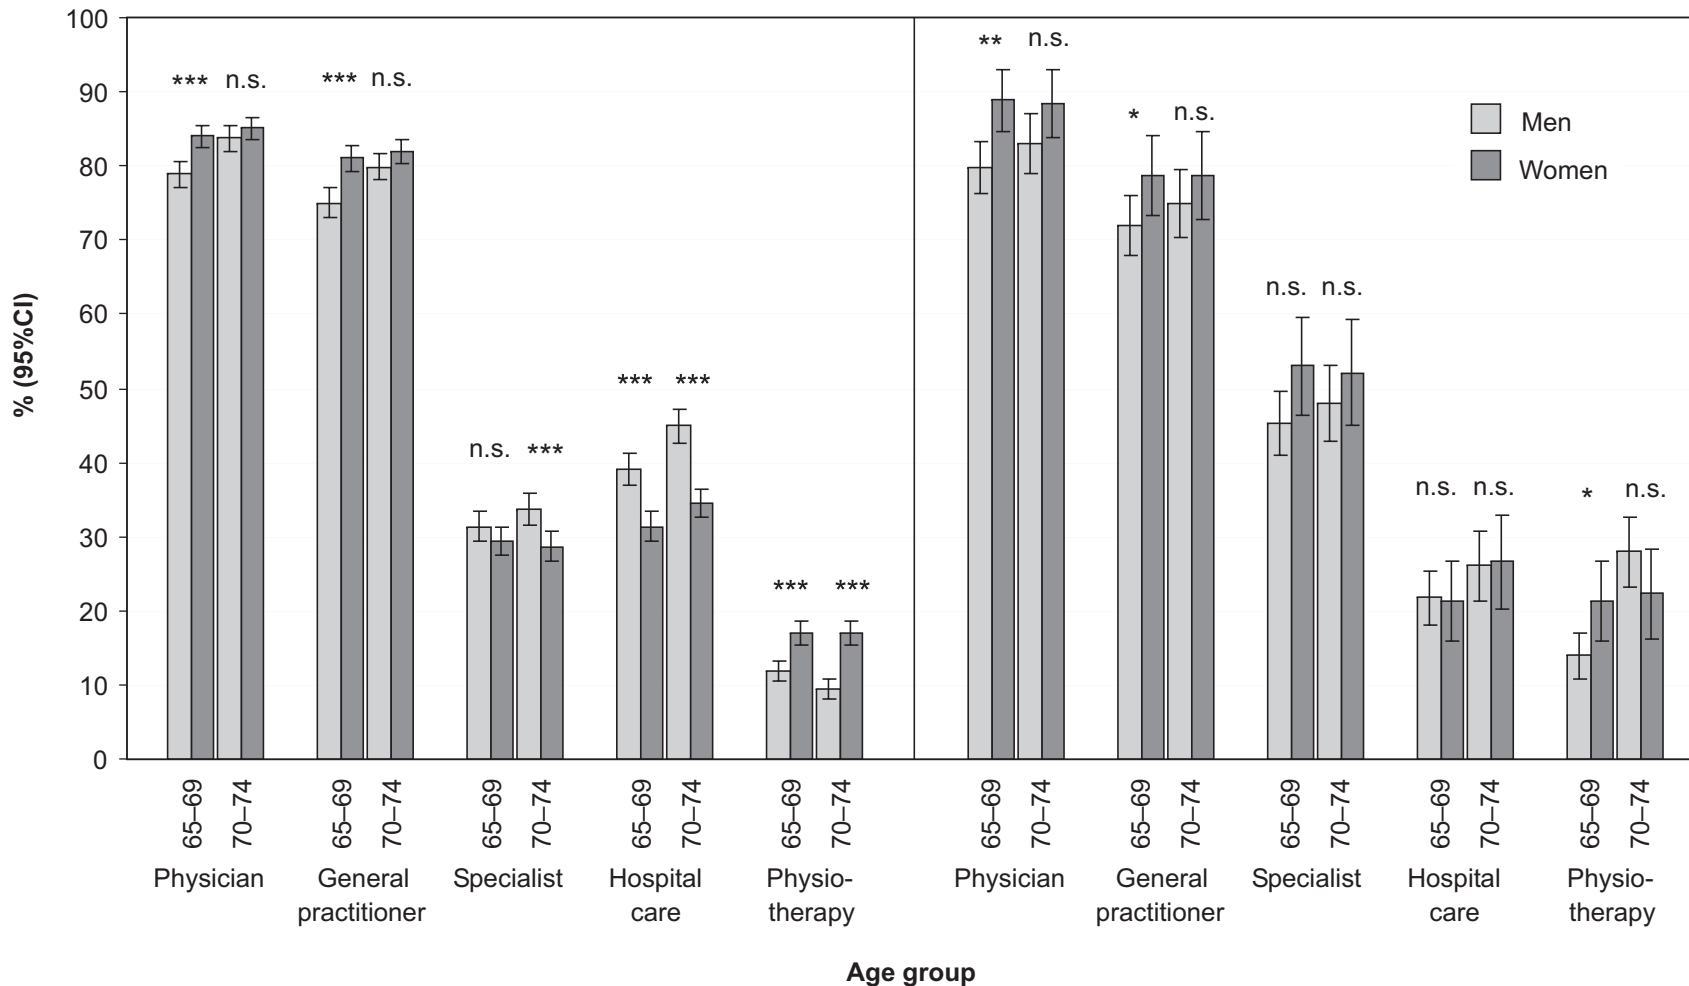

Supplement: MOESM1 [file 9534412]
